# Supplementary material for: Computational pathology of pre-treatment biopsies identifies lymphocyte density as a predictor of response to neoadjuvant chemotherapy in breast cancer
Source: PubMed Central journal article supplement (PMC4755003; doi:10.1186/s13058-016-0682-8), 2016-02-16

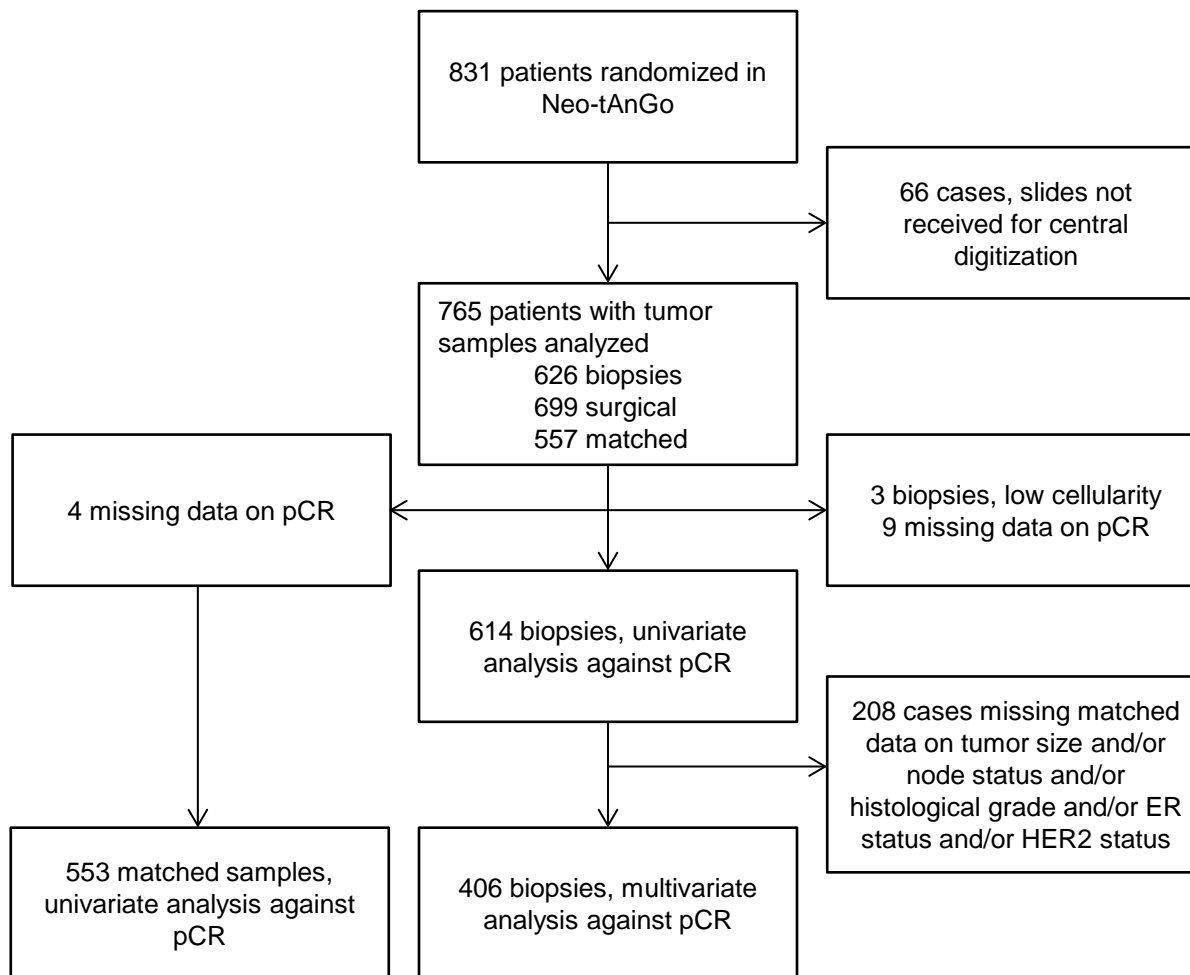

Supplement: 13058_2016_682_MOESM2_ESM.pdf [file 13058_2016_682_MOESM2_ESM.pdf]
