# Supplementary material for: Computational pathology of pre-treatment biopsies identifies lymphocyte density as a predictor of response to neoadjuvant chemotherapy in breast cancer
Source: Springer Nature journal article supplement (doi:10.1186/s13058-016-0682-8), 2016-02-16

## Cancer

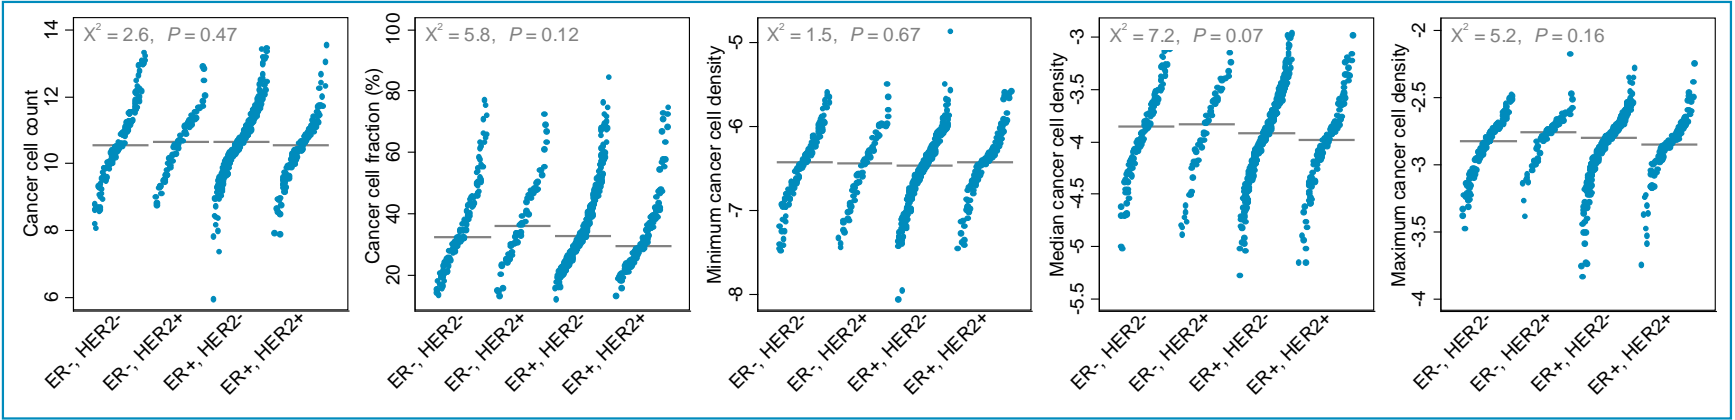

## Stromal

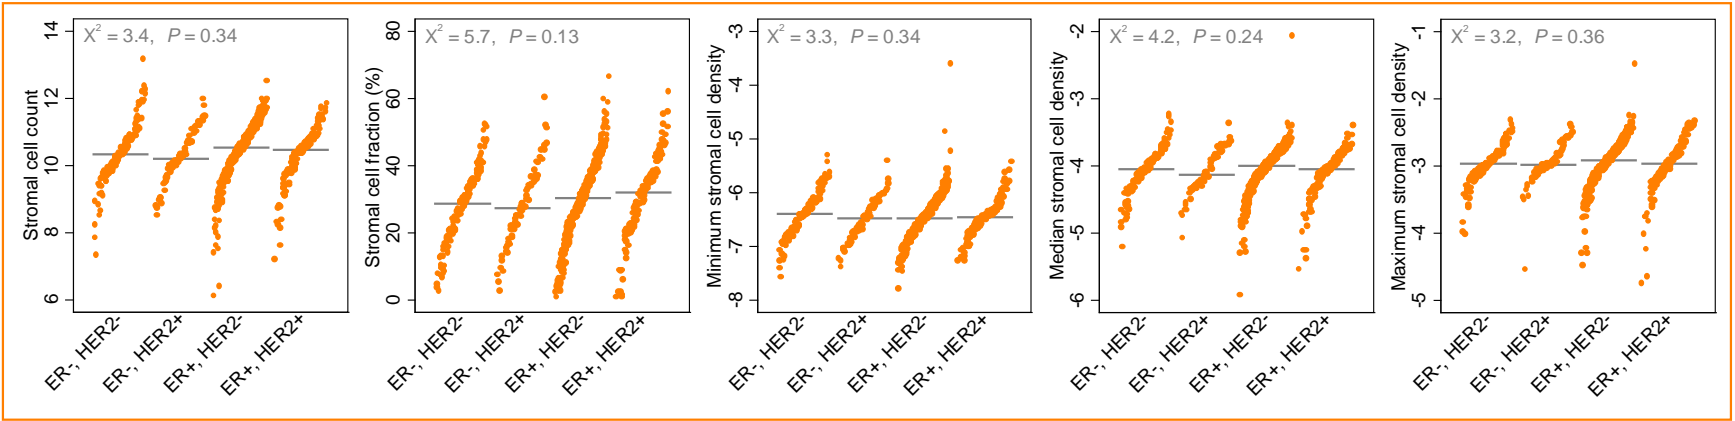

## Lymphocyte

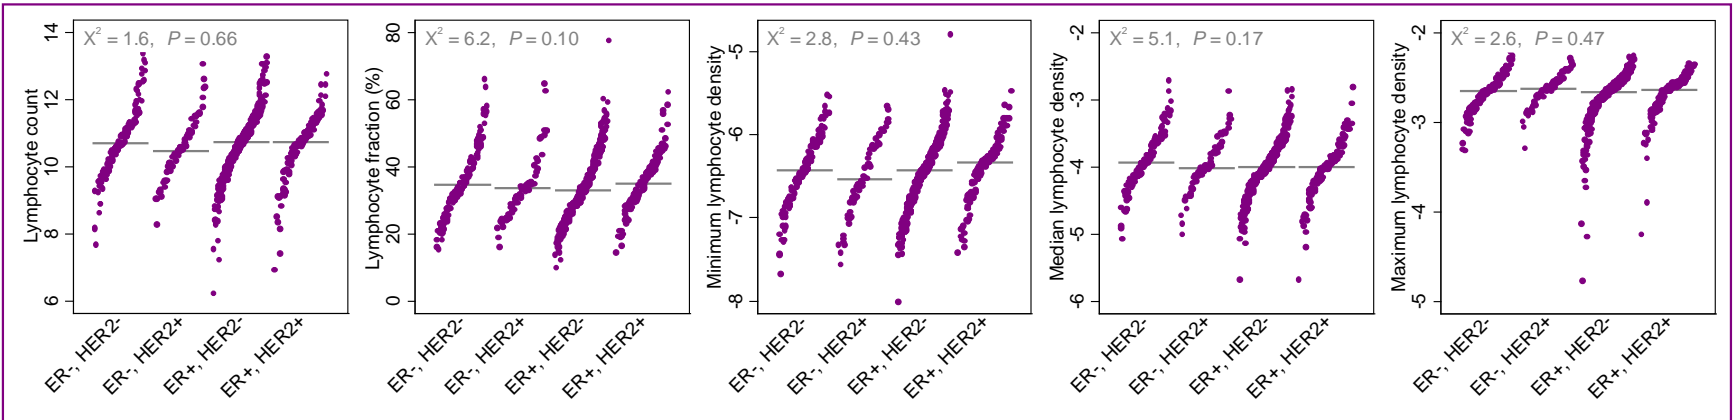

Supplement: MOESM7 [file 9781656]
